## 1 **Beyond taxonomic identification: integration of ecological responses to a soil** 2 **bacterial 16S rRNA gene database.**

3 Briony A. Jones<sup>1,3</sup>, Tim Goodall<sup>2</sup>, Paul George<sup>1,3</sup>, Hyun Soon Gweon<sup>4</sup>, Jeremy Puissant<sup>5</sup>, Daniel Read<sup>2</sup>,  
4 Bridget A. Emmett<sup>1</sup>, David A. Robinson<sup>1</sup>, Davey L. Jones<sup>2</sup>, Robert I. Griffiths<sup>1</sup>

5 <sup>1</sup>Centre for Ecology and Hydrology, Bangor, UK

6 <sup>2</sup>Centre for Ecology and Hydrology, Wallingford, UK

7 <sup>3</sup>School of Environment, Natural Resources and Geography, Bangor University, UK

8 <sup>4</sup>School of Biological Sciences, University of Reading, RG6 6AS, UK

9 <sup>5</sup>Institute of Research for Development (IRD, Montpellier), France

10 Correspondence: Rob Griffiths ([rig@ceh.ac.uk](mailto:rig@ceh.ac.uk)) and Briony A. Jones ([brijon@ceh.ac.uk](mailto:brijon@ceh.ac.uk))

11

### 12 **Abstract**

13 High-throughput sequencing 16S rRNA gene surveys have enabled new insights into the  
14 diversity of soil bacteria, and furthered understanding of the ecological drivers of abundances  
15 across landscapes. However, current analytical approaches are of limited use in formalising  
16 syntheses of the ecological attributes of taxa discovered, because derived taxonomic units are  
17 typically unique to individual studies and sequence identification databases only characterise  
18 taxonomy. To address this, we used sequences obtained from a large nationwide soil survey  
19 (GB Countryside Survey, henceforth CS) to create a comprehensive soil specific 16S reference  
20 database, with coupled ecological information derived from the survey metadata. Specifically,  
21 we modelled taxon responses to soil pH at the OTU level using hierarchical logistic regression  
22 (HOF) models, to provide information on putative landscape scale pH-abundance responses.  
23 We identify that most of the soil OTUs examined exhibit predictable abundance responses  
24 across soil pH gradients, though with the exception of known acidophilic lineages, the pH  
25 optima of OTU relative abundance was variable and could not be generalised by broad  
26 taxonomy. This highlights the need for tools and databases to predict ecological traits at finer  
27 taxonomic resolution. We further demonstrate the utility of the database by testing against  
28 geographically dispersed query 16S datasets; evaluating efficacy by quantifying matches, and  
29 accuracy in predicting pH responses of query sequences from a separate large soil survey. We  
30 found that the CS database provided good coverage of dominant taxa; and that the taxa  
31 indicating soil pH in a query dataset corresponded with the pH classifications of top matches  
32 in the CS database. Furthermore we were able to predict query dataset community structure,  
33 using predicted abundances of dominant taxa based on query soil pH data and the HOF models  
34 of matched CS database taxa. The database with associated HOF model outputs is released as  
35 an online portal for querying single sequences of interest ([https://shiny-apps.ceh.ac.uk/ID-  
36 TaxER/](https://shiny-apps.ceh.ac.uk/ID-TaxER/)), and flat files are made available for use in bioinformatic pipelines. The further  
37 development of advanced informatics infrastructures incorporating modelled ecological  
38 attributes along with new functional genomic information will likely facilitate large scale  
39 exploration and prediction of soil microbial functional biodiversity under current and future  
40 environmental change scenarios.

41

## 42 Introduction

43 Soil bacteria are highly diverse<sup>1,2</sup> and are significant contributors to soil functionality.  
44 Sequencing of 16S rRNA genes has enabled a wealth of new insights into the taxonomic  
45 diversity of soil prokaryotic communities, revealing the ecological controls on a vast diversity  
46 of yet to be cultured taxa with unknown functional potential<sup>3</sup>. However, despite thousands of  
47 studies across the globe, we are still some way from synthesising the new knowledge on the  
48 ecology of these novel organisms recovered through local and distributed soil surveillance.  
49 This is because there is currently no formalised way of retrieving ecological information on  
50 reference sequences which match user-discovered taxa (either clustered operational taxonomic  
51 units or amplicon sequence variants). Whilst we have a wealth of databases and tools for  
52 characterising the taxonomy of matched sequences<sup>4-6</sup>, databases do not include any associated  
53 ecological information on sequences matches. Whilst new software has recently become  
54 available that uses text mining to return some ecological data on matched sequences to NCBI,  
55 this information is currently limited to descriptions of sequence associated habitat<sup>7</sup>.

56 Synthesising relationships between soil amplicon abundances and environmental  
57 parameters is now necessary to progress ecological understanding of soil microbes beyond  
58 those few organisms that are readily cultivated. Determining microbial responses across  
59 environmental gradients can inform on the realised niche widths of discrete taxa, and may  
60 indicate the presence of shared functional traits across taxa<sup>8</sup>. This information is now urgently  
61 needed for microbes as we move into a period of increasing genomic data availability for  
62 uncultivated taxa. Coupling data on taxon responses across environmental gradients with  
63 functional trait information potentially allows a mechanistic and predictive understanding of  
64 both biodiversity and ecosystem level responses to environmental change. For example, a large  
65 body of theory exists describing how species responses to environmental change affects  
66 ecosystem functioning<sup>9-11</sup>. Here functional “response” groups are defined as species sharing a  
67 similar response to an environmental driver; and functional “effect” groups refer to species that  
68 have similar effects on one or more ecosystem processes. The degree of coupling between  
69 response and effect groups can then allow prediction of functional effects under change. For  
70 instance if certain phylogenetic groups of taxa decrease due to environmental change, and these  
71 taxa also represent an effect group (eg these taxa possess a unique functional gene) then we  
72 can expect the function to also decrease. Conversely with uncoupled effect groups (eg  
73 responsive taxa all possess a ubiquitous functional gene), the system is likely to be more  
74 functionally resistant to change<sup>11</sup>. Applying such concepts to microbial ecology is a realistic  
75 ambition given the extensive availability of amplicon datasets coupled to environmental  
76 information, and the increasing feasibility of uncultivated microbial genome assembly from  
77 metagenomes or single cell genomics<sup>12-14</sup>.

78 The fast evolution of microbial taxa coupled with potential horizontal gene transfer has  
79 led to assumptions that microbial diversity may be largely functionally redundant<sup>15</sup>. However  
80 we know from large-scale amplicon surveys that there are distinct differences in soil bacterial  
81 composition across environmental gradients, with soil pH frequently observed as a primary  
82 correlate<sup>16, 17</sup>. This implies that different microbial phylogenetic lineages possess adaptations  
83 conferring altered competitiveness in soils of different pH; paving the way for future studies

84 into the genomic basis, and thereby elucidating specific genetic “response traits”. There is also  
85 evidence that many specific bacterial functional capacities such as methanogenesis (an “effect”  
86 trait) are phylogenetically conserved and therefore may be less redundant<sup>18</sup>. Determining the  
87 degree of functional redundancy in taxa which respond across soil pH gradients, will permit  
88 new insight into the microbial biodiversity mechanisms underpinning soil functionality and  
89 resilience to change. Since soil pH is largely predictable from geo-climatic<sup>19</sup> and land use  
90 features<sup>20</sup>; prediction of the abundances of individual bacterial taxa under environmental  
91 change scenarios is likely to be feasible. The immediate challenge is therefore to establish  
92 predictive frameworks for many soil bacterial taxa, which can be populated with genomic  
93 information as it becomes available; to ultimately facilitate predictions of microbial functional  
94 distributions.

95 We believe that attempts to progress understanding of the ecological attributes of  
96 environmentally retrieved bacterial taxa can be streamlined immediately by making better use  
97 of the extensive amplicon datasets that exist, which already provide much useful information  
98 on taxa-environment responses. Indeed it has recently been shown that many prokaryotic taxa  
99 are distributed globally (particularly dominant OTUs<sup>21</sup>), yet there is currently no way to  
100 formally capture their ecological attributes in databases for further microbiological and  
101 ecological enquiry other than in supplementary material spreadsheets. Here we seek to address  
102 this by making available a database of representative sequences from a large 16S rRNA  
103 amplicon dataset from over 1000 soil samples collected across Britain. In addition to providing  
104 standard taxonomic annotation, we also seek to add ecological response information to each  
105 representative sequence. We focus here on soil pH responses as bacterial communities are  
106 known to respond strongly across soil pH gradients<sup>17</sup>. We will firstly model OTU abundances  
107 across to soil pH using hierarchical logistic regression (HOF)<sup>22, 23</sup>, a commonly used approach  
108 to examine vegetation responses across ecological gradients<sup>24</sup> which has yet to be widely  
109 applied to microbial datasets. We will use model outputs to assign each OTU to a specific pH  
110 response group based on abundance optima, and in addition demonstrate the utility of the  
111 database in determining the phylogenetic relationships in ecological responses. The utility of  
112 the database will be further tested on 16S datasets to compare both the hit rate and modelled  
113 responses. The OTU database with associated HOF model outputs is released both as an online  
114 portal for visualising individual queries and as flat files for integration into existing  
115 bioinformatics pipelines.

116

117

118

119

120

121

122

## 123 **Results and discussion**

### 124 **Database Coverage**

125 The database was constructed from sequences obtained from the 2007 Countryside  
126 Survey (CS), a random stratified sampling of most soil types and habitats across Great Britain,  
127 full details of which are provided elsewhere<sup>10, 17, 25</sup>. Sequencing of 1113 soils using the  
128 universal 341f/806r<sup>26</sup> primers targeting the V3 and V4 regions of the 16S rRNA gene yielded  
129 a total of 39952 reference sequence OTUs, after clustering at 97% sequence similarity and  
130 singleton removal. Coverage was assessed on a filtered dataset of 1006 samples which had at  
131 least 5000 reads per sample, using sample based species accumulation curves calculated per  
132 habitat class and pooled across all habitats (**Fig.1**). The curves for individual habitats, whilst  
133 not reaching saturation, reveal some interesting trends with grasslands exhibiting highest  
134 biodiversity at the landscape scale, which is likely attributable to the broad range of soil  
135 conditions they encompass. The pooled curves across all habitats however appear to begin to  
136 level off, which importantly reveals that in total the reference sequence dataset provides good  
137 coverage of the non-singleton 97% OTUs found across this landscape.

### 138 **Performance of database against independent datasets**

139 The coverage of this dataset was further assessed through blasting representative  
140 sequences from independent 16S datasets from various locations and habitats, against all 39952  
141 CS representative sequences (**Table 1**). For the two soil datasets, we found over 50% of the  
142 OTUs which had been independently generated in each of these studies, could be matched to  
143 the CS database based at > 97%. Expectedly, this was in stark contrast to a fresh water dataset  
144 which exhibited much less overlap with the CS soils database with a hit rate of only 33.2%.  
145 16S sequences from dataset 1 (**Table 1**), a study of land use change across the UK<sup>27</sup>, also  
146 sequenced with the same 341f/806r primer set, had the highest hit rate against the CS  
147 representative sequences (67.26%). Wider assessment of our own unpublished datasets using  
148 the exact same methodologies yield hit rates of 62% and 56% for soils from UK calcareous  
149 grasslands and tropical rainforests respectively. A separate survey of Welsh soils<sup>28</sup> was also  
150 queried against the CS database, which used the commonly used Earth Microbiome primer set  
151 exclusively targeting the V4 region (as opposed to V3 and V4 targeted region used for the CS  
152 dataset). This dataset had a hit rate of 58.49% providing evidence that datasets amplified with  
153 other primer sets can be matched to the CS database with only marginal loss of coverage.

154 We next wanted to explore possible reasons for obtaining less than 100% coverage from  
155 query soil datasets, given the good coverage of the CS reference sequence database evident  
156 from the rarefaction curve (**Fig.1**). We predicted this discrepancy was caused by rare OTU's  
157 being unique to specific studies, and tested this by classifying the query OTU's into 1000  
158 discrete abundance based quantiles (1 being the most abundant quantile and 1000 being the  
159 least). Plotting the proportion of query OTU's which matched to the CS database by query  
160 OTU abundance class, confirmed that less abundant query OTU's had less matches to the CS  
161 database (**Fig.2**). This adds weight to arguments that much of the rare taxa detected through  
162 amplicon sequencing could be spurious artefacts of the PCR amplification process<sup>29</sup>.  
163 Regardless of these issues, the high proportion of hits for dominant taxa in the query dataset  
164 validates the use of the large CS dataset as a comprehensive reference database.

165

## 166 **Modelling OTU responses to soil pH.**

167 Since the majority of the 39952 reference OTU's obtained across all CS samples likely  
168 derive from rare taxa with intrinsically little value for predictive modelling (low within-sample  
169 abundance, and occurrence across samples), we opted to only model taxa-pH relationships for  
170 those taxa which occurred in at least 30 samples. These taxa were selected from a cleaned  
171 dataset of 1006 samples which had at least 5000 reads per sample. Further examination of the  
172 species accumulation by sample curves for the resulting 13781 OTU's, revealed saturation  
173 implying that this dataset had complete coverage of common OTU's, defined by being present  
174 in at least 30 samples across Britain. Huisman-Olff-Fresco models were then applied to  
175 determine individual bacterial taxa responses to pH using the R package eHOF using a poisson  
176 error distribution<sup>14, 22</sup>. Model choice was determined using AIC and bootstrapping methods  
177 implemented in the package, whereby the model with the lowest AIC was initially chosen and  
178 its robustness then tested by rerunning models on 100 bootstrapped datasets (created by  
179 resampling with replacement). If the most frequently chosen model in the bootstrap runs was  
180 different to the initial model choice, the most common bootstrap choice was selected. The  
181 resultant pH-taxa response curves classified by the HOF models include I: no significant  
182 change in abundance in response to pH, II: an increasing or decreasing trend, III: increasing or  
183 decreasing trend which plateaus, IV: Increase and decrease by same rate (unimodal) and V:  
184 Increase and decrease by different rates causing skew (**Fig.3**).

185 The proportion of OTUs assigned to each model is shown in **Table 2**, and reveals that  
186 most of the soil OTUs exhibited some trend with soil pH, and with the unimodal skewed model  
187 (V) being the most commonly fitted model type (45.76%). OTU's were then assigned to pH  
188 response groups based on the fitted pH optima. We classified OTUs demonstrating an acidic  
189 preference if the fitted optima was below pH 5.2, based on previous data showing this  
190 represented a critical threshold for bacterial communities<sup>10</sup>, which was further confirmed by a  
191 similar regression tree analyses of this sequence dataset (not shown). This pH value also  
192 represents a critical threshold in microbial functioning<sup>30</sup>. Similarly, a second threshold was  
193 designated at pH 7, with OTUs exhibiting an optima above this being classed as neutral, and  
194 those between 5.2 and 7 classed as "mid". Plateau model shapes (model III), were sometimes  
195 more difficult to classify, since two optima are provided which span the plateau, and in some  
196 cases these crossed the pH 5.2 and 7 thresholds. Whilst OTUs exhibiting this response were  
197 in the minority, we opted to assign a separate designation representing this range, for instance  
198 "acid to mid" for an OTU with two optima above and below pH 5.2. The proportion of taxa  
199 classified to each pH response group are shown in **Table 3**. This reveals that OTUs with acidic  
200 preference are in the minority, consistent with reduced bacterial biodiversity being frequently  
201 observed in acidic soils<sup>17</sup>.

202 Representative sequences of all 13781 OTU's were aligned with Clustal Omega 1.2.1  
203 (<http://www.clustal.org/>), and used to construct a Phylogenetic tree with FastTree 2.1.7<sup>31</sup>, with  
204 the generalized time-reversible (GTR) model of nucleotide evolution. The tree is shown in **Fig.**  
205 **4** together with the pH classification derived from the HOF models. Distinct phylogenetic  
206 clustering is apparent for phyla with representatives known to have acidophilic preferences  
207 such as the Acidobacteria<sup>15</sup>. Additionally other phyla such as the Verrucomicrobia appear to  
208 possess clades with a distinct pH preference. However, the overall impression across other  
209 taxonomic groups is that the pH abundance optima can vary substantially amongst closely  
210 related taxa. This emphasises the need to move beyond the association of traits with broad

211 phylogenetic lineages; and identifies the need to determine traits at finer levels of taxonomic  
212 resolution.

### 213 **Incorporating CS data and pH responses into a sequence identification tool**

214 A web application was developed using the Shiny package (<https://shiny.rstudio.com/>)  
215 which enables users to BLAST a 16S query sequence against the countryside survey  
216 representative sequences, subsequently allowing visualization of key environmental  
217 information including HOF model outputs, relevant to individual matched sequences. The  
218 Graphic User Interface was implemented in R (3.4.1) using the Shiny package alongside  
219 ShinyJS to execute JavaScript functions from R. BLASTn commands are executed from R  
220 using the users query sequence, e value of 0.01, and the reference sequence database of CS  
221 representative sequences. eHOF model objects were converted to binary using the Rbase  
222 serialize function and stored in a PostgreSQL (9.3.17) database (<https://www.postgresql.org/>)  
223 alongside model and other environmental metadata (**Supp.fig.1**). BLAST results are displayed  
224 as an interactive table of hits, each hit linking to a plot of the pH model fit (based upon raw  
225 read number), a LOESS fit (based on relative abundance), a box plot of habitat associations  
226 and a simple interpolated map showing relative abundance distribution across Britain  
227 (**Supp.fig.2**). Additionally we provide a text box which can be populated with user submitted  
228 trait related information on matched OTUs. The application is available at [https://shiny-  
229 apps.ceh.ac.uk/ID-TaxER/](https://shiny-apps.ceh.ac.uk/ID-TaxER/) and to facilitate batch processing of query sequences the sequence  
230 database, taxonomy and trait matrix are released via github ([https://github.com/brijon/ID-  
231 TaxER-flat-files](https://github.com/brijon/ID-TaxER-flat-files)) for integration into bioinformatics pipelines.

232

### 233 **Utility in predicting pH preferences and community structure using a query dataset**

234 To demonstrate both the utility of the reference sequence database, and the HOF  
235 modelling approach to identify environmental responses of soil bacterial taxa, we used a query  
236 dataset of >400 samples collected across Britain (dataset 1, **Table 1**). Since this survey  
237 focussed on productive habitats (grassland and arable land uses), with only a few acidic  
238 samples, it was not appropriate to generate independent HOF models. Instead we classified the  
239 samples according to the same pH cutoff levels identified above (pH5.2 and 7) and then  
240 determined pH responsive taxa using Indicator species analyses<sup>32</sup>. As can be seen in **Fig.5a**,  
241 the pH groupings were clearly evident in the sample based ordination. Representative  
242 sequences from this dataset were then blasted against the CS database, and optimum pH and  
243 pH classification metrics retrieved from the top hit for subsequent comparison. In total 477  
244 indicators for the three pH groupings were retrieved, of which 454 had a match greater than  
245 97% similarity to the CS database. Of the 155 acidic indicator taxa identified in the query  
246 dataset, 129 (83%) were reliably classified as acidic OTUs based on matches to the CS database  
247 (**Fig 5b**), with 20 OTUs “incorrectly” classified as having a mid-pH optima. However the  
248 predicted optima of these OTUs was mainly below pH 6 and most lie very close to pH 5.2.  
249 Similarly for the 226 query taxa identified as indicating neutral soils, 203 (90%) had a neutral  
250 pH classification in the CS database, with 15 being incorrectly classed as mid, though the  
251 optima for these was between pH 6.5 and 7. Sixty-seven indicators of the query mid pH soils  
252 were obtained of which 64 (96%) had a mid pH classification based on match to the CS  
253 database. Overall this analyses shows that information on soil pH preferences from independent  
254 datasets can be reliably obtained using our approach.

255 We then sought to test whether we could reliably predict community structure using the  
256 CS HOF model outputs to predict query OTU abundances. We identified the most abundant  
257 OTUs in the query dataset, and blasted against the CS database. CS HOF models were then  
258 used to predict the abundances of the 100 matched dominant OTUs within the 424 query  
259 samples. This predicted community matrix was then subject to NMDS ordination with the first  
260 axis scores plotted against the actual observed ordination scores generated from 24260 OTUs.  
261 The results in **Fig 5c** show that the observed and predicted first axis ordination scores were  
262 highly related ( $r^2 = 0.88$ ) demonstrating that it is possible to predict broad scale community  
263 change from individual OTU relative abundance pH models. These findings add to a growing  
264 body of literature on the predictability of soil bacterial communities<sup>33-35</sup>; but furthermore  
265 demonstrate the utility of our overall approach in deriving meaningful ecological information  
266 from matches to a 16S rRNA sequence database incorporating ecological responses.

## 267 **Conclusions**

268 This work demonstrates how large scale soil molecular survey data can be used to build  
269 robust predictive models of bacterial abundance responses across environmental gradients. The  
270 models were applied to the single soil variable of pH which is known globally to be the  
271 strongest predictor of soil bacterial community structure in surveys spanning wide  
272 environmental gradients. We have produced an informatics tool incorporating extensive  
273 sequence data from a wide range of soils, linked to taxonomic and ecological response  
274 information. This currently includes data on the modelled pH optima, and the predictive utility  
275 in this regard was demonstrated using an independent dataset. Other ecological information is  
276 also made available via an online portal including habitat association, spatial distribution, and  
277 metrics relating to abundance and occurrence. We are currently working on incorporating other  
278 information on the sensitivities of discrete OTUs to land use change; and there is the wider  
279 potential for users to update the trait matrix with other observations (more information provided  
280 at <https://github.com/brijon/ID-TaxER-flat-files>). Such information could include sensitivities  
281 to perturbations such as climate change, as well as rRNA derived links to wider genome data  
282 to inform on function.

283 We anticipate this simple database and tool will be of use to the soil molecular  
284 community, but also hope it prompts further global efforts to better capture relevant ecological  
285 information on newly discovered microbial taxa. We acknowledge some limitations of the  
286 current tool, and identify some possibilities to develop further: Firstly being a 16S rRNA  
287 amplicon dataset, the database inventory will be affected by known biases relating to PCR  
288 primers and amplification conditions<sup>36</sup>; and obviously, user datasets built on a different region  
289 of the 16S rRNA gene will not produce any matches. Additionally the length of sequences  
290 means only limited taxonomic resolution is currently provided, and ecological inferences based  
291 on BLAST matches must consider the strength of match, and variance within the matched  
292 region with respect to taxonomic discrimination<sup>37</sup>. Emerging long read sequencing  
293 technologies applied to survey nucleic acid archives in the future may improve these current  
294 constraints<sup>38</sup>. With respect to the pH models, many other factors can of course influence  
295 bacterial abundances<sup>3, 39</sup>, and we note the large degree of variance in relative abundance for a  
296 taxon even within its apparent pH niche optima (**Fig 3**). Such variance could may be caused by  
297 nutrient availability, stress etc and more complex models, albeit constrained by pH, need to be  
298 formulated to advance predictive accuracy. More generally, we assert that observed taxon  
299 relative abundance only inform on relative taxon success at a given soil pH, and does not

300 identify any explicit underpinning ecological mechanism (eg pH stress tolerance versus  
301 competitive fitness)<sup>40</sup>. However, linking emerging genomic data to detailed environmentally  
302 relevant sequence databases such as detailed here, will likely improve future understanding in  
303 relation to elucidating specific functional response traits and determining mechanisms  
304 underpinning bacterial community assembly along soil gradients. Finally, and importantly, the  
305 CS database is spatially constrained to a temperate island in Northern Europe, and would  
306 benefit from a more global extent to capture other soil biomes such as drylands. Improvements  
307 here could be made from integrating data from global sequencing initiatives, or leveraging data  
308 from sequence repositories provided consistent environmental metadata can also be retrieved  
309 in order to reliably predict response trait characteristics.

310

## 311 **Methods**

312 Samples were collected as part of the Centre for Ecology and Hydrology Countryside  
313 survey (CS) between June and July 2007 covering sites throughout Great Britain. Samples were  
314 chosen through a stratified random sample of 1 km squares using a 15 km grid, implementing  
315 the institute of Terrestrial Ecology (ITE) land classification to ensure incorporation of different  
316 land classes, with up to 5 randomly sampled cores taken within each square. Metadata for each  
317 soil sample were collated including soil organic matter, soil organic carbon, bulk density, pH,  
318 indicator of phosphorus availability using methodologies detailed elsewhere<sup>17, 25</sup>.

319 DNA was extracted from 0.3g of soil using the MoBIO PowerSoil-htp 96 Well DNA  
320 Isolation kit (Carlsbad, CA) according to manufacturer protocols. Amplicon libraries were  
321 constructed according to the dual indexing strategy of Kozich et al<sup>41</sup>, using primers 341F<sup>42</sup> and  
322 806R<sup>43</sup>. Amplicons were generated using a high fidelity DNA polymerase (Q5 Taq, New  
323 England Biolabs) on 20 ng of template DNA employing an initial denaturation of 30 seconds  
324 at 95 °C, followed by (25 for 16S and 30 cycles for ITS and 18S) of 30 seconds at 95 °C, 30  
325 seconds at 52 °C and 2 minutes at 72 °C. A final extension of 10 minutes at 72 °C was also  
326 included to complete the reaction. Amplicon sizes were determined using an Agilent 2200  
327 TapeStation system (~550bp) and libraries normalized using SequelPrep Normalization Plate  
328 Kit (Thermo Fisher Scientific). Library concentration was calculated using a SYBR green  
329 quantitative PCR (qPCR) assay with primers specific to the Illumina adapters (Kappa,  
330 Anachem). Libraries were sequenced at a concentration of 5.4 pM with a 0.6 pM addition of  
331 an Illumina generated PhiX control library. Sequencing runs, generating 2 x 300 bp, reads were  
332 performed on an Illumina MiSeq using V3 chemistry.

333 Sequenced paired-end reads were joined using PEAR<sup>44</sup>, quality filtered using FASTX  
334 tools (hannonlab.cshl.edu), length filtered with the minimum length of 300bp. The presence of  
335 PhiX and adapters were checked and removed with BBTools (jgi.doe.gov/data-and-  
336 tools/bbtools/), and chimeras were identified and removed with VSEARCH\_UCHIME\_REF<sup>45</sup>  
337 using Greengenes Release 13\_5 (at 97%). Singletons were removed and the resulting sequences  
338 were clustered into operational taxonomic units (OTUs) with VSEARCH\_CLUSTER at 97%  
339 sequence identity. Representative sequences for each OTU were taxonomically assigned by  
340 RDP Classifier with the bootstrap threshold of 0.8 or greater using the Greengenes Release  
341 13\_5 (full) as the reference. All statistical analyses and visualisations were conducted within  
342 the R package, predominantly using the vegan and ggplot packages unless otherwise indicated.

343



## 344 **Acknowledgements**

345 This work has been funded by the UK Natural Environment Research Council under the Soil  
346 Security Programme grant “U-GRASS” (NE/M017125/1) and an ENVISION DTP studentship  
347 award to Briony Jones.

348

## 349 **References**

- 350 1. Gans J, Wolinsky M, Dunbar J. Computational improvements reveal great bacterial diversity and  
351 high metal toxicity in soil. *Science*. 2005;309(5739):1387-90.
- 352 2. Roesch LFW, Fulthorpe RR, Riva A, Casella G, Km A, Kent AD, et al. Pyrosequencing  
353 enumerates and contrasts soil microbial diversity. *The ISME Journal*. 2010;1(4):283--90.
- 354 3. Fierer N. Embracing the unknown: disentangling the complexities of the soil microbiome. *Nat Rev*  
355 *Microbiol*. 2017;15(10):579-90.
- 356 4. McDonald D, Price MN, Goodrich J, Nawrocki EP, DeSantis TZ, Probst A, et al. An improved  
357 Greengenes taxonomy with explicit ranks for ecological and evolutionary analyses of bacteria and  
358 archaea. *ISME J*. 2012;6(3):610-8.
- 359 5. Wang Q, Garrity GM, Tiedje JM, Cole JR. Naive Bayesian classifier for rapid assignment of rRNA  
360 sequences into the new bacterial taxonomy. *Appl Environ Microbiol*. 2007;73(16):5261-7.
- 361 6. Quast C, Pruesse E, Yilmaz P, Gerken J, Schweer T, Yarza P, et al. The SILVA ribosomal RNA  
362 gene database project: improved data processing and web-based tools. *Nucleic Acids Res*.  
363 2013;41(Database issue):D590-6.
- 364 7. Sinclair L, Ijaz UZ, Jensen LJ, Coolen MJL, Gubry-Rangin C, Chronakova A, et al. Seqenv:  
365 linking sequences to environments through text mining. *PeerJ*. 2016;4(e2690):e2690.
- 366 8. Martiny JBH, Jones SE, Lennon JT, Martiny AC. Microbiomes in light of traits: A phylogenetic  
367 perspective. *Science*. 2015;350(6261):aac9323.
- 368 9. Lavorel S, Garnier E. Predicting changes in community composition and ecosystem functioning  
369 from plant traits: revisiting the Holy Grail. *Funct Ecol*. 2002;16(5):545-56.
- 370 10. Suding KN, Lavorel S, Chapin FS, Cornelissen JHC, Diaz S, Garnier E, et al. Scaling  
371 environmental change through the community-level: a trait-based response-and-effect framework for  
372 plants. *Global Change Biol*. 2008;14(5):1125-40.
- 373 11. Diaz S, Purvis A, Cornelissen JH, Mace GM, Donoghue MJ, Ewers RM, et al. Functional traits,  
374 the phylogeny of function, and ecosystem service vulnerability. *Ecol Evol*. 2013;3(9):2958-75.
- 375 12. Choi J, Yang F, Stepanauskas R, Cardenas E, Garoutte A, Williams R, et al. Strategies to improve  
376 reference databases for soil microbiomes. *The ISME Journal*. 2017;11(4):829-34.
- 377 13. van Elsas JD, Boersma FGH. A review of molecular methods to study the microbiota of soil and  
378 the mycosphere. *European Journal of Soil Biology*. 2011;47(2):77-87.
- 379 14. Gao J, Li F, Gao H, Zhou C, Zhang X. The impact of land-use change on water-related ecosystem  
380 services: a study of the Guishui River Basin, Beijing, China. *Journal of Cleaner Production*.  
381 2017;163:S148-S55.
- 382 15. Martiny JB, Bohannan BJ, Brown JH, Colwell RK, Fuhrman JA, Green JL, et al. Microbial  
383 biogeography: putting microorganisms on the map. *Nat Rev Microbiol*. 2006;4(2):102-12.
- 384 16. Fierer N, Jackson RB. The diversity and biogeography of soil bacterial communities. *Proc Natl*  
385 *Acad Sci U S A*. 2006;103(3):626-31.
- 386 17. Griffiths RI, Thomson BC, James P, Bell T, Bailey M, Whiteley AS. The bacterial biogeography  
387 of British soils. *Environ Microbiol*. 2011;13(6):1642-54.
- 388 18. Martiny AC, Treseder K, Pusch G. Phylogenetic conservatism of functional traits in  
389 microorganisms. *The ISME Journal*. 2013;7(4):830-8.
- 390 19. Slessarev EW, Lin Y, Bingham NL, Johnson JE, Dai Y, Schimel JP, et al. Water balance creates a  
391 threshold in soil pH at the global scale. *Nature*. 2016;540:567.
- 392 20. Wamelink GWW, Walvoort DJJ, Sanders ME, Meeuwssen HAM, Wegman RMA, Pouwels R, et  
393 al. Prediction of soil pH patterns in nature areas on a national scale. *Applied Vegetation Science*.  
394 2019;22(2):189-99.

- 395 **21.** Delgado-Baquerizo M, Oliverio AM, Brewer TE, Benavent-González A, Eldridge DJ, Bardgett  
396 RD, et al. A global atlas of the dominant bacteria found in soil. *Science*. 2018;359(6373):320-5.
- 397 **22.** Jansen F, Oksanen J. How to model species responses along ecological gradients – Huisman–  
398 Olff–Fresco models revisited. *Journal of Vegetation Science*. 2013;24(6):1108-17.
- 399 **23.** Huisman J, Olff H, Fresco LFM. A Hierarchical Set of Models for Species Response Analysis.  
400 *Journal of Vegetation Science*. 1993;4(1):37-46.
- 401 **24.** Diekmann M, Michaelis J, Pannek A. Know your limits – The need for better data on species  
402 responses to soil variables. *Basic and Applied Ecology*. 2015;16(7):563-72.
- 403 **25.** Reynolds B, Chamberlain PM, Poskitt J, Woods C, Scott WA, Rowe EC, et al. Countryside  
404 Survey: National “Soil Change” 1978–2007 for Topsoils in Great Britain—Acidity, Carbon, and Total  
405 Nitrogen Status. *Vadose Zone Journal*. 2013;12.
- 406 **26.** Takahashi S, Tomita J, Nishioka K, Hisada T, Nishijima M. Development of a prokaryotic  
407 universal primer for simultaneous analysis of Bacteria and Archaea using next-generation sequencing.  
408 *PLoS One*. 2014;9(8):e105592.
- 409 **27.** Malik AA, Puissant J, Buckeridge KM, Goodall T, Jehmlich N, Chowdhury S, et al. Land use  
410 driven change in soil pH affects microbial carbon cycling processes. *Nature Communications*.  
411 2018;9(1):3591.
- 412 **28.** George PBL, Lallias D, Creer S, Seaton FM, Kenny JG, Eccles RM, et al. Divergent national-  
413 scale trends of microbial and animal biodiversity revealed across diverse temperate soil ecosystems.  
414 *Nature Communications*. 2019;10(1):1107.
- 415 **29.** Edgar RC. Accuracy of microbial community diversity estimated by closed- and open-reference  
416 OTUs. *PeerJ*. 2017;5(6226):e3889.
- 417 **30.** Jones DL, Cooledge EC, Hoyle FC, Griffiths RI, Murphy DV. pH and exchangeable aluminum  
418 are major regulators of microbial energy flow and carbon use efficiency in soil microbial  
419 communities. *Soil Biology and Biochemistry*. 2019;138:107584.
- 420 **31.** Price MN, Dehal PS, Arkin AP. FastTree 2 – Approximately Maximum-Likelihood Trees for  
421 Large Alignments. *PLOS ONE*. 2010;5(3):e9490.
- 422 **32.** Dufrene M, Legendre P. Species assemblages and indicator species: The need for a flexible  
423 asymmetrical approach. *Ecological Monographs*. 1997;67(3):345-66.
- 424 **33.** Griffiths RI, Thomson BC, Plassart P, Gweon HS, Stone D, Creamer RE, et al. Mapping and  
425 validating predictions of soil bacterial biodiversity using European and national scale datasets.  
426 *Applied Soil Ecology*. 2016;97:61-8.
- 427 **34.** Fierer N, Ladau J, Clemente JC, Leff JW, Owens SM, Pollard KS, et al. Reconstructing the  
428 microbial diversity and function of pre-agricultural tallgrass prairie soils in the United States. *Science*.  
429 2013;342(6158):621-4.
- 430 **35.** Bickel S, Chen X, Papritz A, Or D. A hierarchy of environmental covariates control the global  
431 biogeography of soil bacterial richness. *Scientific Reports*. 2019;9(1):12129.
- 432 **36.** Thijs S, Op De Beeck M, Beckers B, Truyens S, Stevens V, Van Hamme JD, et al. Comparative  
433 Evaluation of Four Bacteria-Specific Primer Pairs for 16S rRNA Gene Surveys. *Front Microbiol*.  
434 2017;8:494-.
- 435 **37.** Fox GE, Wisotzkey JD, Jurtshuk P. How Close Is Close: 16S rRNA Sequence Identity May Not  
436 Be Sufficient To Guarantee Species Identity. *International Journal of Systematic and Evolutionary*  
437 *Microbiology*. 1992;42(1):166-70.
- 438 **38.** Singer E, Bushnell B, Coleman-Derr D, Bowman B, Bowers RM, Levy A, et al. High-resolution  
439 phylogenetic microbial community profiling. *ISME J*. 2016;10(8):2020-32.
- 440 **39.** Thomson BC, Ostle N, McNamara N, Bailey MJ, Whiteley AS, Griffiths RI. Vegetation affects  
441 the relative abundances of dominant soil bacterial taxa and soil respiration rates in an upland  
442 grassland soil. *Microbial ecology*. 2010;59(2):335-43.
- 443 **40.** Austin MP. The potential contribution of vegetation ecology to biodiversity research. *Ecography*.  
444 1999;22(5):465-84.
- 445 **41.** Kozich JJ, Westcott SL, Baxter NT, Highlander SK, Schloss PD. Development of a Dual-Index  
446 Sequencing Strategy and Curation Pipeline for Analyzing Amplicon Sequence Data on the MiSeq  
447 Illumina Sequencing Platform. *Appl Environ Microb*. 2013;79(17):5112-20.

- 448 **42.** Muyzer G, de Waal EC, Uitterlinden AG. Profiling of complex microbial populations by  
449 denaturing gradient gel electrophoresis analysis of polymerase chain reaction-amplified genes coding  
450 for 16S rRNA. *Appl Environ Microb.* 1993;59(3):695-700.
- 451 **43.** Caporaso JG, Lauber CL, Walters WA, Berg-Lyons D, Lozupone CA, Turnbaugh PJ, et al. Global  
452 patterns of 16S rRNA diversity at a depth of millions of sequences per sample. *Proceedings of the*  
453 *National Academy of Sciences.* 2011;108(Supplement 1):4516-22.
- 454 **44.** Zhang J, Kobert K, Flouri T, Stamatakis A. PEAR: a fast and accurate Illumina Paired-End reAd  
455 mergeR. *Bioinformatics.* 2013;30(5):614-20.
- 456 **45.** Rognes T, Flouri T, Nichols B, Quince C, Mahé F. VSEARCH: a versatile open source tool for  
457 metagenomics. *PeerJ.* 2016;4:e2584.
- 458 **46.** Read DS, Gweon HS, Bowes MJ, Newbold LK, Field D, Bailey MJ, et al. Catchment-scale  
459 biogeography of riverine bacterioplankton. *The ISME journal.* 2015;9(2):516-26.
- 460 **47.** Brewer TE, Handley KM, Carini P, Gilbert JA, Fierer N. Genome reduction in an abundant and  
461 ubiquitous soil bacterium 'Candidatus Udaeobacter copiosus'. *Nat Microbiol.* 2016;2(October  
462 2016):16198.

463

464

465

466

467

468

469

470

471

472

473

474

475

476

477

478

479

480

481

482

483

484

485 **Tables**

| Query Dataset | Habitat Description                 | Query OTU hit rate | Primer          | Citation                                                                  |
|---------------|-------------------------------------|--------------------|-----------------|---------------------------------------------------------------------------|
| 1             | Grassland and arable soils, Britain | 67.26%             | 341f/806r V3-V4 | Malik <i>et al.</i> , 2018 <sup>27</sup>                                  |
| 2             | All habitat soils survey, Wales     | 58.49%             | 515f/806rB V4   | George <i>et al.</i> , 2019 <sup>28</sup>                                 |
| 3             | Thames River, Britain               | 33.2%              | 341f/806r V3-V4 | Unpublished temporal extension of Read <i>et al.</i> , 2015 <sup>46</sup> |

486  
 487 **Table 1. Validating the use of the CS OTU sequences as a database, through querying with**  
 488 **independent datasets.** Reference sequences from independent datasets were BLAST searched against  
 489 countryside survey representative sequences, and the proportion of OTUs matched at over 97%  
 490 similarity reported. British soil query datasets had highest hit rates irrespective of methodologies, with  
 491 a set of riverine samples showing lowest proportion of OTU's matching the CS soil reference database.

492

493

| Model fit           | Percentage of Countryside survey OTU's |
|---------------------|----------------------------------------|
| V (Skewed Unimodal) | 45.76%                                 |
| III (Plateau)       | 24.13%                                 |
| IV (Unimodal)       | 23.52%                                 |
| II (Monotonic)      | 6.11%                                  |
| I (No trend)        | 0.49%                                  |

494  
 495 **Table 2. Percentage of 13781 CS OTUs fitted to each HOF model.** Each OTU was classified to  
 496 one of five HOF model types according to fitted relationships with soil pH. The different model  
 497 response shapes are shown in Fig 3.

498

499

| pH Response group                                            | Percentage of Countryside survey OTU's |
|--------------------------------------------------------------|----------------------------------------|
| <b>Mid</b> (5.2 < Optima < 7)                                | 34.8%                                  |
| <b>Neutral</b> (Optima > 7)                                  | 31.62%                                 |
| <b>Acid</b> (Optima < 5.2)                                   | 23.08%                                 |
| <b>Mid to Neutral</b> (5.2 < Optimum1 < 7 and Optimum 2 > 7) | 7.41%                                  |
| <b>Acid to Neutral</b> (Optimum1 <5.2 and Optimum2 >7)       | 1.52 %                                 |
| <b>Acid to Mid</b> (Optimum1 <5.2 and 5.2 < Optimum2 < 7 )   | 1.14%                                  |

500  
 501 **Table 3. Percentage of 13781 CS OTU's classified to different pH response groups.** Each OTU was  
 502 assigned to a pH response classification based on the modelled pH optima. The model outputs with one  
 503 optima (II, IV,V) were classified as acidic, mid or neutral based on pH thresholds identified above.  
 504 Plateau shaped models with 2 optima (model III), which spanned the pH thresholds were labelled as  
 505 either mid to neutral, acid to neutral, or acid to mid.

506 **Figures**

507

508

509

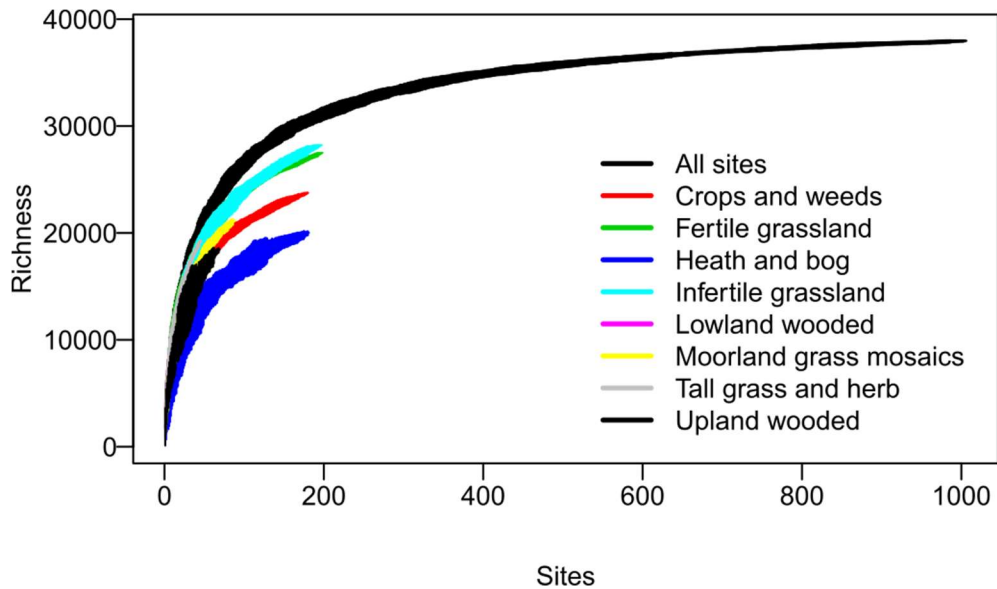

510

511

512 **Fig.1 Coverage of bacterial 97% OTUs within the Countryside Survey (CS) dataset.** Sample  
513 based richness accumulation curves were calculated across 1006 CS soil samples (“All sites”), and  
514 within specific habitats. Standard deviations are calculated from random permutations of the data.

515

516

517

518

519

520

521

522

523

524

525

526

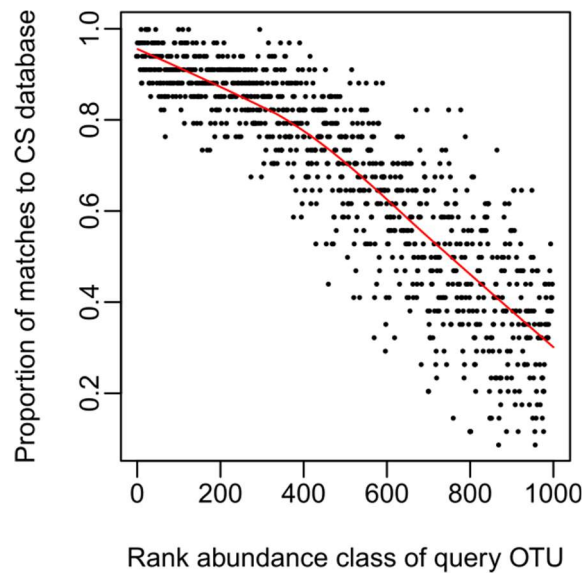

529 **Fig.2 The CS database provides good coverage of dominant taxa within a query dataset.** Query  
530 OTU reference sequences (dataset 1, table 1) were grouped into 1000 bins by decreasing rank (e.g the  
531 1000th bin contains the least abundant OTUs); and the proportion of each bin matching the CS dataset  
532 calculated and displayed on the y axis. The proportion of matches to the CS database (> 97% similarity)  
533 declines as query taxa become rarer, despite the comprehensive nature of the CS database.

534

535

536

537

538

539

540

541

542

543

544

545

546

547

548

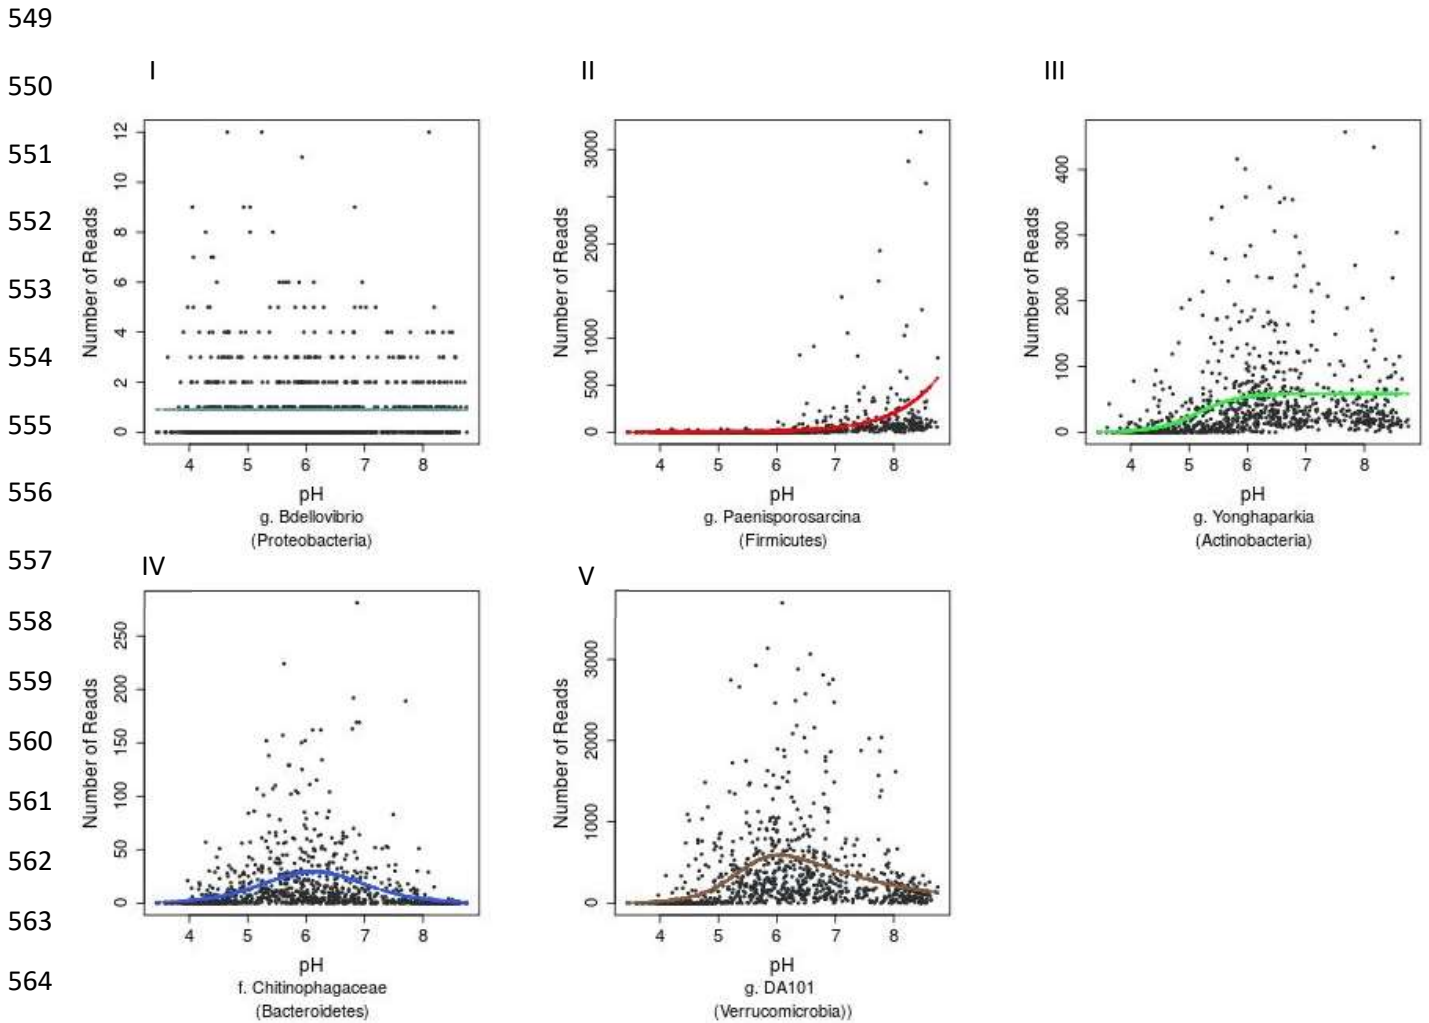

566 **Fig.3 Examples of the five HOF model types.** HOF models were generated through fitting  
567 countryside survey OTU abundances to soil pH (a pH range from 3.63 to 8.75). The five HOF models  
568 used were: I: no change in abundance across pH gradient, II: monotonic an increase or decrease in  
569 abundance along pH gradient, III: plateau an increase or decrease in abundance along pH gradient that  
570 plateaus, IV: symmetrical unimodal, abundance increases and decreases across gradient at an equal  
571 rate, V: skewed unimodal, abundance increases and decreases across gradient at unequal rates.

572

573

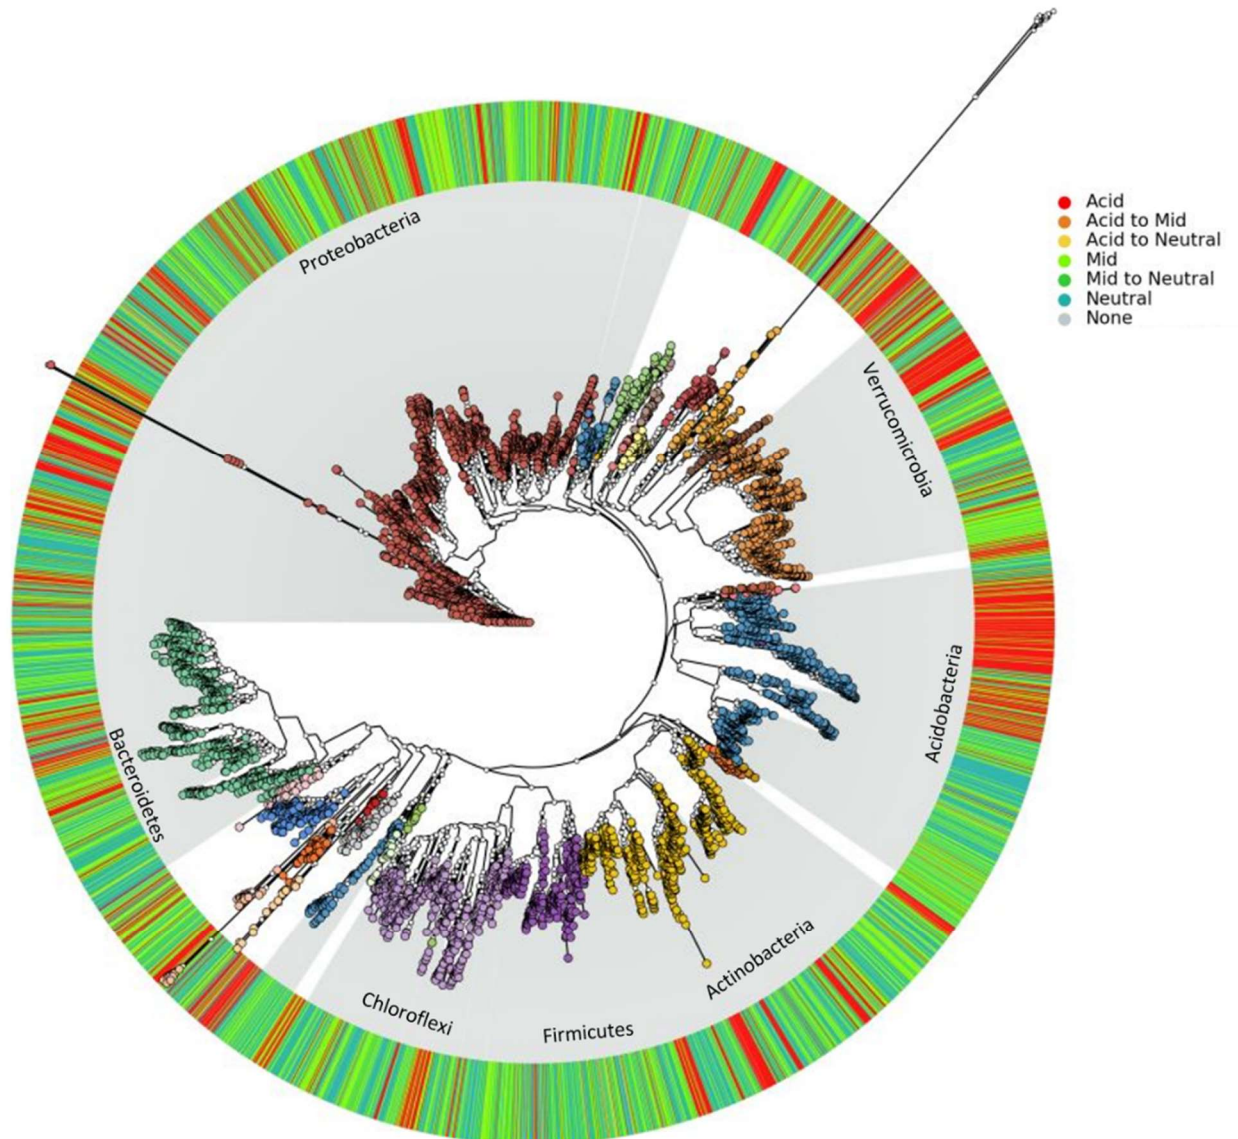

574

575 **Fig.4 The phylogenetic distribution of bacterial pH optima.** A phylogenetic tree of all OTUs with  
576 present in >100 samples (totalling 6385 OTU's), with each OTU annotated according to pH  
577 classification based on HOF model optima (outer ring).

578

579

580



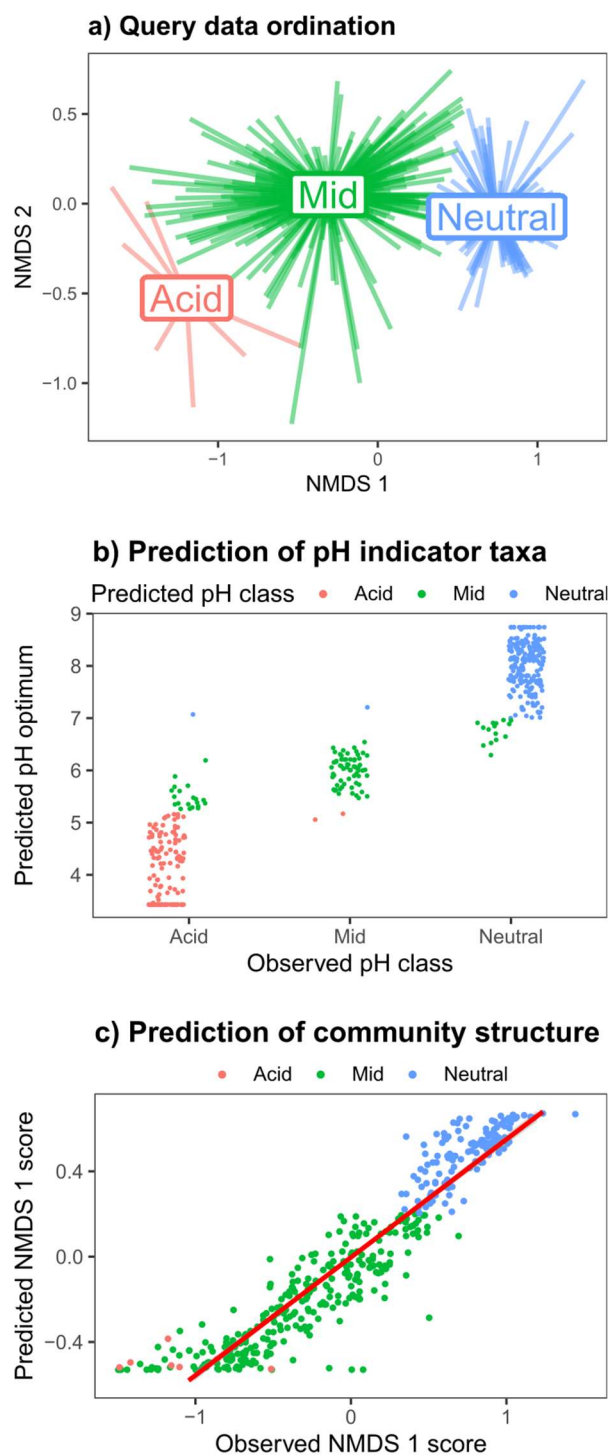

581

582 **Fig.5 Validating the pH models using a query dataset.** Taxa strongly responsive to soil pH were  
583 identified from Query dataset 1 (Table 1), and then matched to the CS database to evaluate utility of  
584 the approach. **a)** NMDS ordination plot of the query dataset, with pH groupings denoted by colour  
585 (red =pH<5.2; green=pH>5.2<7; and blue=ph>7). **b)** Indicator species analyses on the query dataset  
586 revealed 477 OTUS strongly associated with the three pH classes (“Observed pH class”). The y axis  
587 values and point colour denote the predicted pH optimum, and predicted pH class following matching  
588 to CS database. **c)** The relative abundances of the 100 most abundant taxa in the query dataset were  
589 predicted using the CS HOF models of matched taxa, and subjected to NMDS ordination. The plot  
590 shows that the predicted abundances of these taxa reliably predicted the observed data first axis  
591 NMDS scores.

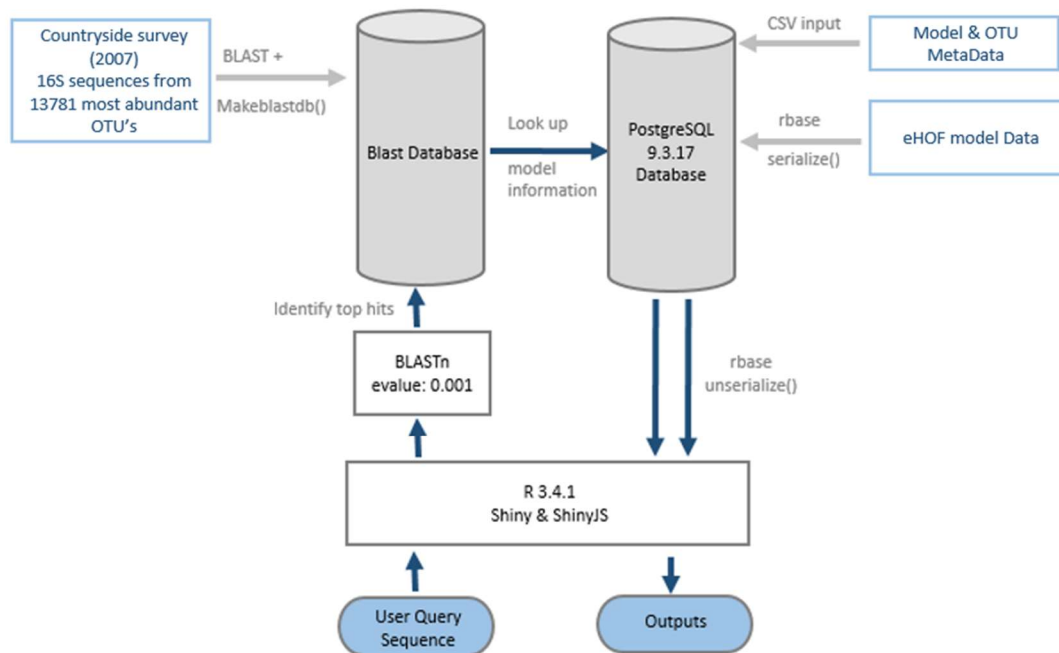

592

593 **Supp.fig.1 ID-TaxER database Infrastructure** 16S sequences are queried over the web via the R  
594 Shiny interface. A BLAST search is then performed against a blast database containing representative  
595 16S sequences from the 2007 Countryside survey . Model information and associated metadata for  
596 match hits are located in a PostgreSQL database of OTU taxonomy/ model data, (model objects are  
597 stored as binary and retrieved for the user) and results displayed via the shiny interface.

598

599

600

601

602

603

604

605

606

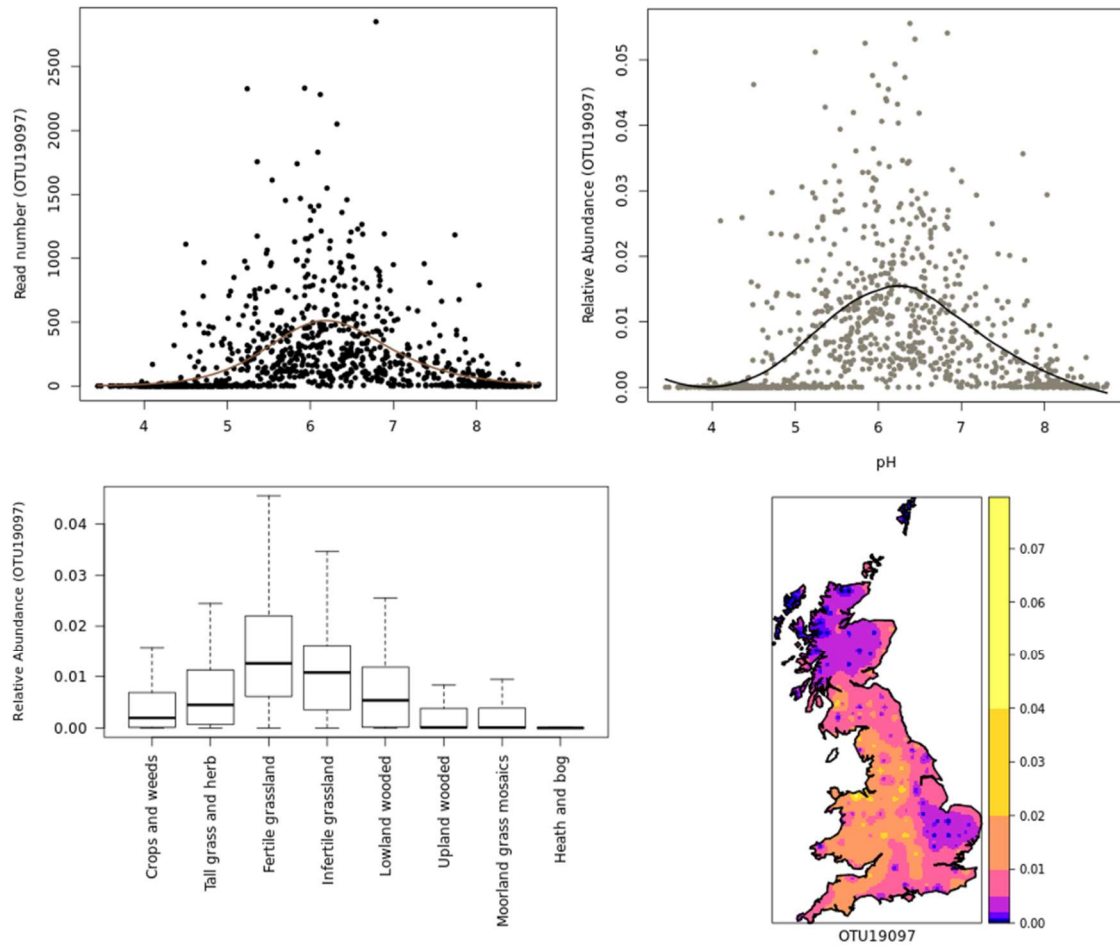

607 **Supp.fig.2 Example outputs from the ID-TaxER online portal.** Using the DA101 /Ca. U.  
608 copiosus<sup>47</sup> 16S sequence (GenBank: Y07576.1) as a query, we found 98.3% identity to CS  
609 OTU19097 (taxonomy=k\_Bacteria; p\_Verrucomicrobia; c\_Spartobacteria; o\_Chthoniobacterales;  
610 f\_Chthoniobacteraceae; g\_DA101): a) HoF model output showing the number of reads of CS  
611 OTU19097 per sample plotted against soil pH; with the line representing the model fit ( Model V,  
612 unimodal response to pH with an optima at pH 6.18) b) the relative abundance of OTU19097 against  
613 sample pH, with the line representing a LOESS fit; c) boxplot showing the median and ranges of the  
614 relative abundance of OTU19097 per CS habitat class; d) inverse distance weighted interpolation map  
615 of the relative abundance of OTU19097 across Britain.

616

617
